# Supplementary material for: Identification of a Novel Gammaretrovirus in Prostate Tumors of Patients Homozygous for R462Q RNASEL Variant
Source: PLOS journal article supplement (doi:10.1371/journal.ppat.0020025), 2006-03-28
Supplement: S2 (10.1371/journal.ppat.0020025.s002) [file journal.ppat.0020025.s002]

### Table S2. PCR primers used for sequencing of XMRV genomes.

| Primer | **Sequence** | XMRV nucleotide position | Source |
| --- | --- | --- | --- |
| 1F | 5'-GCGCCAGTCATCCGATAGACT | 1 | MTCR |
| NA3-136R | 5'-CCCAGTGCTGCAAGGTTAGA | 661 | XMRV VP35 |
| 550F | 5'-CGCCGAAACCGCGCCGCGCGT | 526 | MTCR |
| 1500R | 5'-TCGTCGCCCCGGACTGCCTTTCTG | 1499 | MTCR |
| 1470F | 5'-GACAGGAGAAGAAAAGCAGCG | 1441 | MTCR |
| 2730R | 5'-GCTTGGCGAACTGCCAGTCCC | 2721 | MTCR |
| 2670F | 5'-AGCCGGATGTTTCTCTAGGGT | 2631 | MTCR |
| 3724F | 5’-CTAACGCAAAAACTGGGACCTTG | 3724 | XMRV VP35 |
| 3870R | 5'-GCTTGCCTGCATCTTTTGTC | 3859 | MTCR |
| 3810F | 5'-AGACCCAGTGGCAGCCGGGT | 3780 | MTCR |
| 5190R | 5'-TGACTTACCTGGGAGACGAAG | 5182 | MTCR |
| 5100F | 5'-AACTGCCAAGGTTGTGACCAA | 5071 | MTCR |
| 5842R | 5'-AACTATTGGGGGCCCCACGGGTTA | 5819 | MTCR |
| NA7-F | 5'-CATGGAAAGTCCAGCGTTCT | 5754 | XMRV VP35 |
| C9-R | 5'-AGCTGCTCGAATTGTTTGGT | 7204 | XMRV VP35 |
| 7200F | 5'-CTAGTGGCCACCAAACAATTC | 7173 | MTCR |
| 7600F | 5'-CGCTTGGTCCAGTTTGTAAAA | 7580 | MTCR |
| 227R | 5'-TGGGGAACTTGAAACTGAGG | 7991 | MTCR |
| 100F | 5'-AGGGGCCAAACAGGATAACT | 7780 | MTCR |
| 227R | 5'-TGGGGAACTTGAAACTGAGG | 7991 | MTCR |
| B7F | 5'-TCTGGAAAGTCCCACCTCAG | 7958 | XMRV VP35 |
| K1R | 5'-AAGGCTTTATTGGGAACACG | 8174 | XMRV VP35 |
